# Supplementary material for: Perinatal Outcomes in a Population of Diabetic and Obese Pregnant Women—The Results of the Polish National Survey
Source: PubMed Central journal article supplement (PMC7827210; doi:10.3390/ijerph18020560), 2021-01-11
Supplement: ijerph-18-00560-s001.pdf [file ijerph-18-00560-s001.pdf]

**Table S1.** Characteristics of the study population—raw data.

| Characteristics                                | 2012 |      | 2017 |      | p     |
|------------------------------------------------|------|------|------|------|-------|
|                                                | N    | %    | N    | %    |       |
| <b>Age (years)</b>                             |      |      |      |      | <0.05 |
| ≤25                                            | 833  | 29.5 | 656  | 19.2 |       |
| 26–30                                          | 1085 | 38.4 | 1177 | 34.5 |       |
| Over 30                                        | 906  | 32.1 | 1580 | 46.3 |       |
| <b>Education</b>                               |      |      |      |      | <0.05 |
| Primary                                        | 191  | 6.8  | 187  | 5.5  |       |
| Secondary                                      | 1284 | 45.5 | 1431 | 42.3 |       |
| Tertiary                                       | 1283 | 45.4 | 1704 | 50.3 |       |
| Other                                          | 67   | 2.3  | 64   | 1.9  |       |
| <b>Place of residence (inhabitants)</b>        |      |      |      |      | ns    |
| City (≥100,000)                                | 703  | 25.0 | 804  | 24.1 |       |
| Town/city (<100,000)                           | 945  | 33.7 | 1154 | 34.7 |       |
| Rural area                                     | 1159 | 41.3 | 1373 | 41.2 |       |
| <b>Social conditions</b>                       |      |      |      |      | <0.05 |
| Very good                                      | 731  | 25.9 | 1295 | 37.8 |       |
| Good                                           | 1600 | 56.6 | 1821 | 53.2 |       |
| Average/poor                                   | 494  | 17.5 | 308  | 9.0  |       |
| <b>Economic status</b>                         |      |      |      |      | <0.05 |
| Very good                                      | 284  | 10.1 | 652  | 18.9 |       |
| Good                                           | 1637 | 57.9 | 2188 | 63.4 |       |
| Average/poor                                   | 904  | 32.0 | 611  | 17.7 |       |
| <b>BMI before pregnancy (kg/m<sup>2</sup>)</b> |      |      |      |      | <0.05 |
| <18.5                                          | 252  | 9.2  | 267  | 8.0  |       |
| 18.5–24.99                                     | 1915 | 69.7 | 2211 | 66.5 |       |
| 25.0–29.99                                     | 444  | 16.2 | 599  | 18.0 |       |
| ≥30                                            | 137  | 4.9  | 247  | 7.5  |       |

ns—non-significant,  $p > 0.05$ .
